# Supplementary material
Source: PubMed Central journal article supplement (PMC4850094)
Supplement: NIHMS768923-supplement-Supporting_Information.pdf [file NIHMS768923-supplement-Supporting_Information.pdf]

## Supporting Information

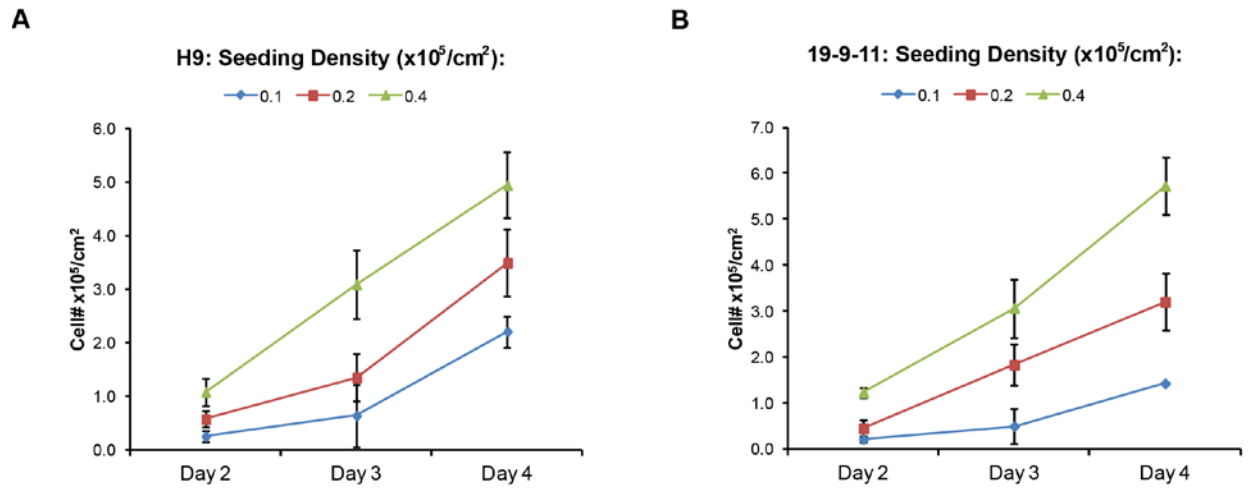

**Supplemental Figure 1.** Cell density increased over time across seeding densities. (A) H9 and (B) 19-9-11 cells were singularized and plated at 0.1, 0.2 and 0.4  $\times 10^5$  cell/ $\text{cm}^2$ . After 2, 3 and 4 days of culture, cells were singularized for counting and determination of cell density. Error bars represent standard deviation of at least three independent experiments.

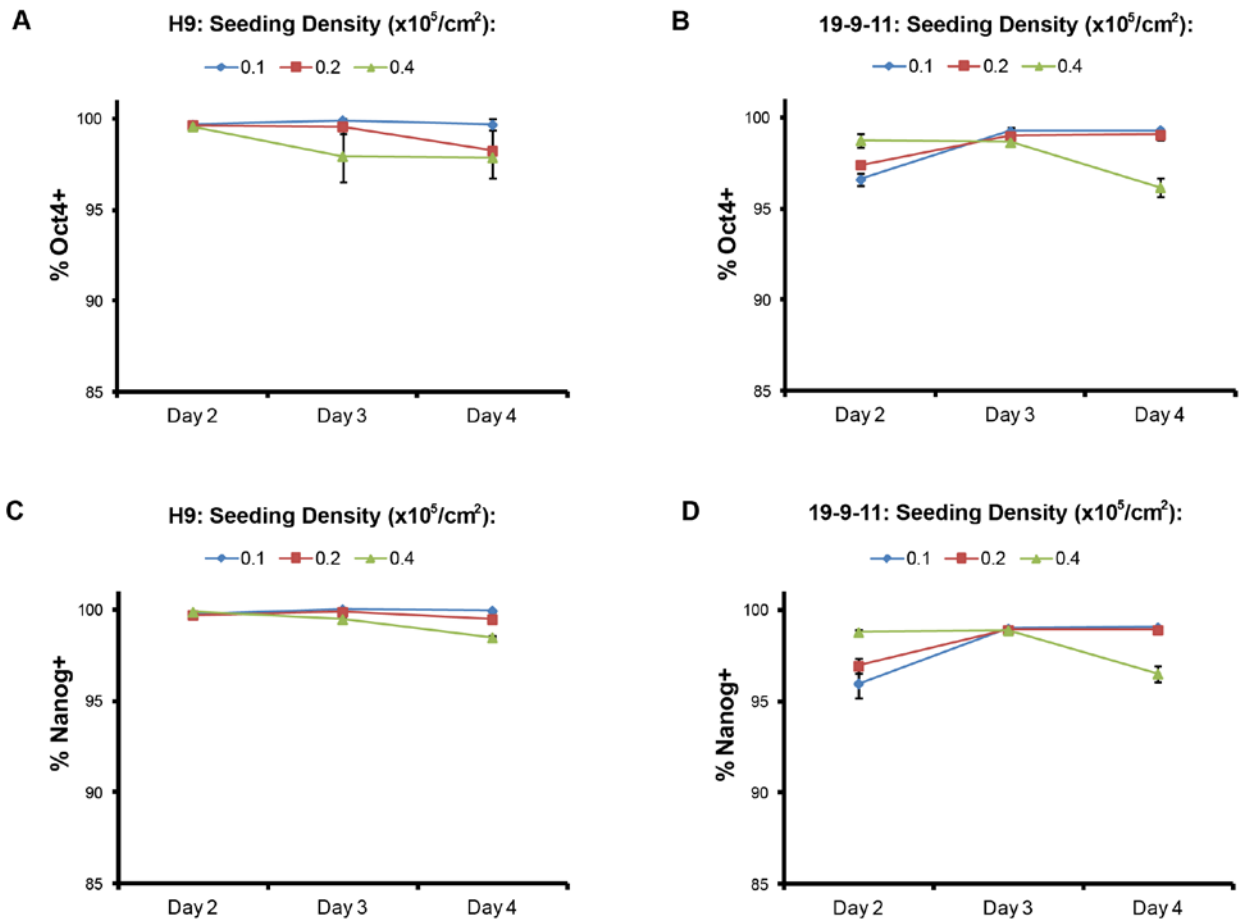

**Supplemental Figure 2.** hPSCs maintained expression of pluripotency markers over time across seeding densities. hPSCs were singularized and plated at 0.1, 0.2 and 0.4  $\times 10^5$  cell/ $\text{cm}^2$ . Cells were harvested for flow cytometry after 2, 3 and 4 days of culture. Analysis of (A) % Oct4+ H9 cells, (B) % Nanog H9 cells, (C) % Oct4+ 19-9-11 cells, and (D) % Nanog+ 19-9-11 cells was performed. Error bars represent standard deviation of at least three independent experiments.

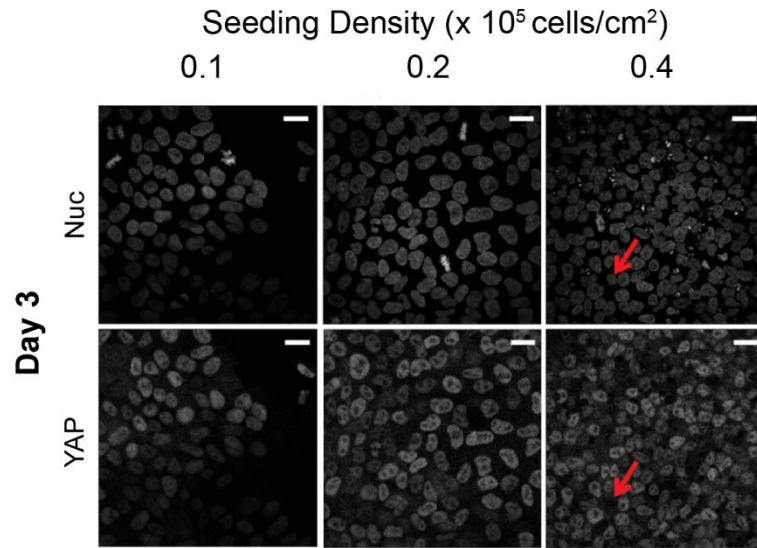

**Supplemental Figure 3.** YAP localization switched from nuclear to cytoplasmic as cell density increased. hPSCs were singularized and plated at 0.1, 0.2 and 0.4  $\times 10^5$  cell/cm<sup>2</sup>. Representative confocal images of the nuclear Hoechst stain and YAP immunofluorescence after 3 days of culture are shown. A nucleus lacking detectable YAP is pointed out by the red arrow. Scale bars = 10  $\mu$ m.

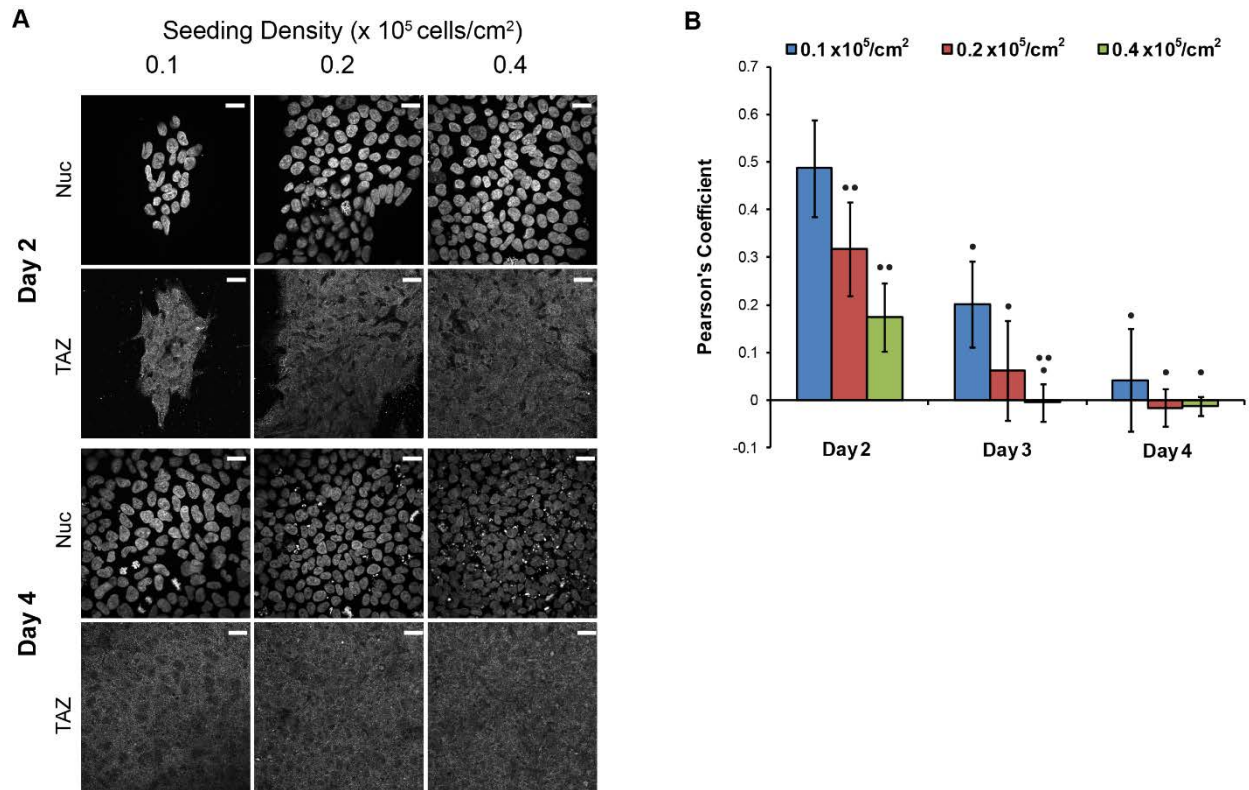

**Supplemental Figure 4.** TAZ localization switched from nuclear to cytoplasmic as cell density increased. hPSCs were singularized and plated at 0.1, 0.2 and 0.4  $\times 10^5$  cell/cm<sup>2</sup>. Cells were fixed and stained after 2, 3 and 4 days of culture. (A) Representative confocal images of the nuclear Hoechst stain and TAZ immunofluorescence at days 2 and 4 are shown. Scale bars represent 10  $\mu$ m. (B) Pearson's coefficients were calculated for 5 to 7 images and averaged for each condition to quantify the colocalization of TAZ with the Hoechst stain. Pearson's coefficient of 1 represents complete colocalization, 0 represents no correlation and -1 represents negative correlation. Error bars represent standard deviation. (\* indicates  $p < 0.05$  compared to Day 2, \*\* indicates  $p < 0.05$  compared to 0.1  $\times 10^5$  cell/cm<sup>2</sup> seeding density on the same day)

**A Substrate: StemAdhere**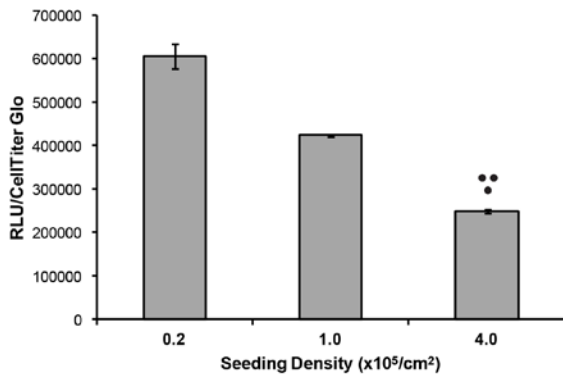**B Substrate: Vitronectin**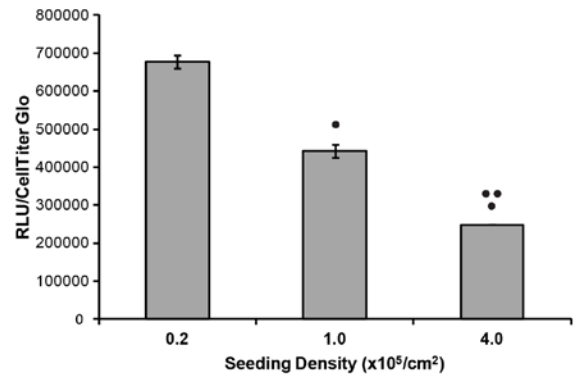**C Substrate: Synthemax**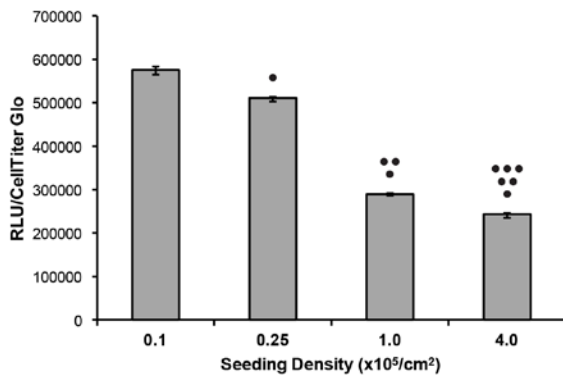

**Supplemental Figure 5.** YAP/TEAD transcriptional activity decreased as hPSC density increased on multiple substrates. hPSCs were singularized and plated at densities of 0.1 to 4.0  $\times 10^5$  cell/cm<sup>2</sup> onto chemically defined substrates (A) StemAdhere, (B) vitronectin, and (C) Synthemax. After 3 days in culture, 50,000 cells were harvested for luciferase assays. Chemiluminescent signal was normalized to CellTiter-Glo signal. Error bars represent standard deviation of at least three independent experiments. (For substrates StemAdhere and vitronectin: • indicates  $p < 0.05$  compared to 0.2  $\times 10^5$  cell/cm<sup>2</sup> seeding density, •• indicates  $p < 0.05$  compared to 1.0  $\times 10^5$  cell/cm<sup>2</sup> seeding density. For substrate Synthemax: • indicates  $p < 0.05$  compared to 0.1  $\times 10^5$  cell/cm<sup>2</sup> seeding density, •• indicates  $p < 0.05$  compared to 0.25  $\times 10^5$  cell/cm<sup>2</sup> seeding density, ••• indicates  $p < 0.05$  compared to 1.0  $\times 10^5$  cell/cm<sup>2</sup> seeding density.)

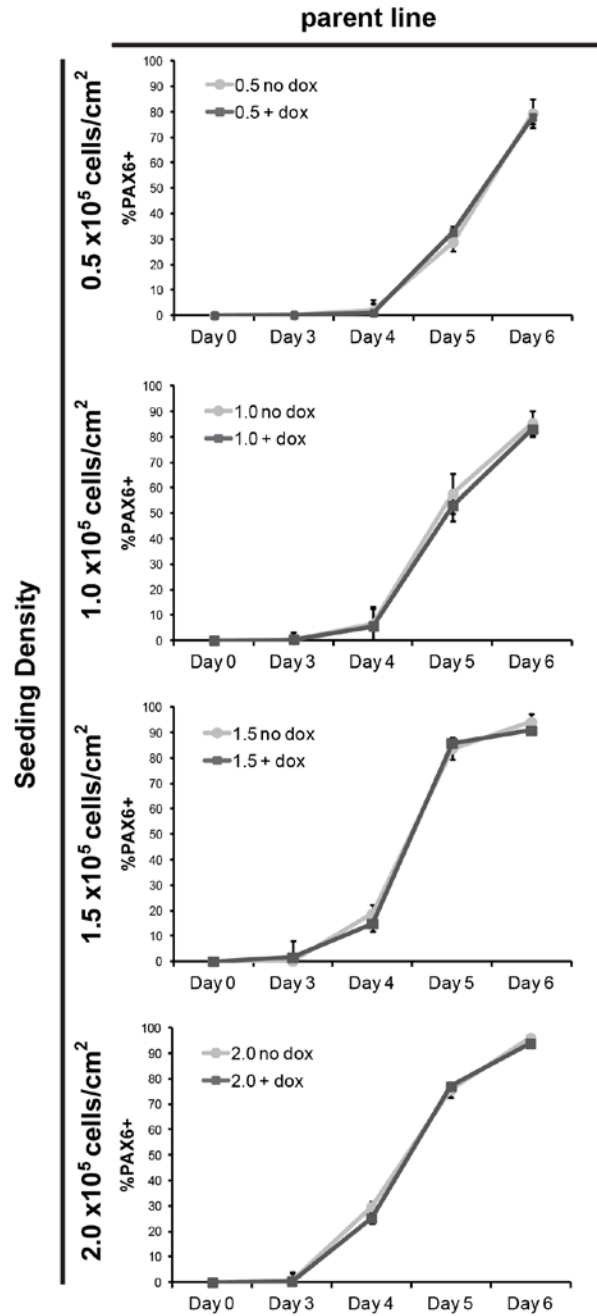

**Supplemental Figure 6.** Addition of doxycycline (dox) did not alter the conversion rate of hPSCs to PAX6+ neuroepithelial cells. H9 hESCs were plated on Matrigel at densities of 0.5, 1.0, 1.5 and 4.0 x 10<sup>5</sup> cell/cm<sup>2</sup> in E8 medium and neuroepithelial differentiation was initiated the next day by changing the medium to E6. Flow cytometry for the percentage of PAX6-positive cells was performed through day 6 of differentiation. Dox was added daily to fresh medium and compared to control cells with no dox added. Error bars represent standard deviation of at least three independent experiments. (• indicates p<0.05 compared to no dox condition on the same-day)

## Seeding Density

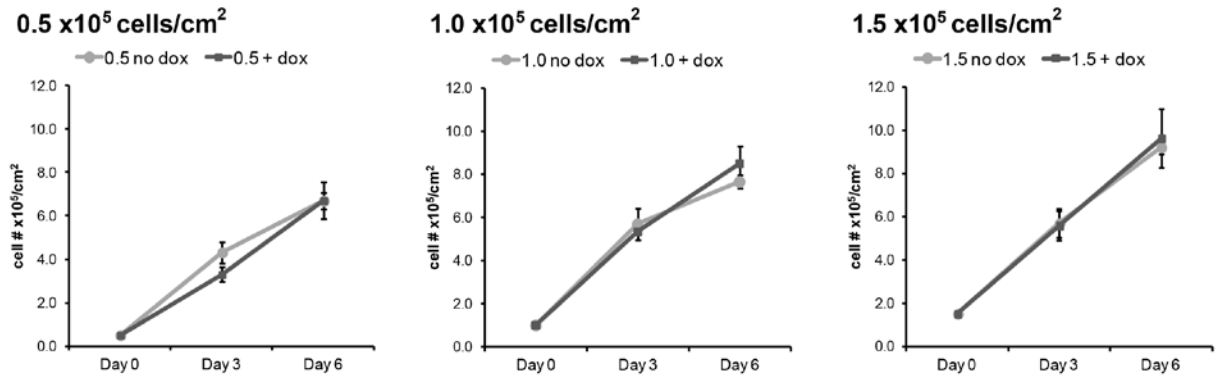

**Supplemental Figure 7.** Addition of doxycycline (dox) did not alter the total number of cells during neuroepithelial differentiation. H9 hESC ishYAP cells were plated on Matrigel at densities of  $0.5$ ,  $1.0$  and  $1.5 \times 10^5$  cell/cm<sup>2</sup> in E8 medium and neuroepithelial differentiation was initiated the next day by changing the medium to E6. Cell counts were performed on days 3 and 6. Dox was added daily to fresh medium and compared to control cells with no dox added. Error bars represent standard deviation of at least three independent experiments.

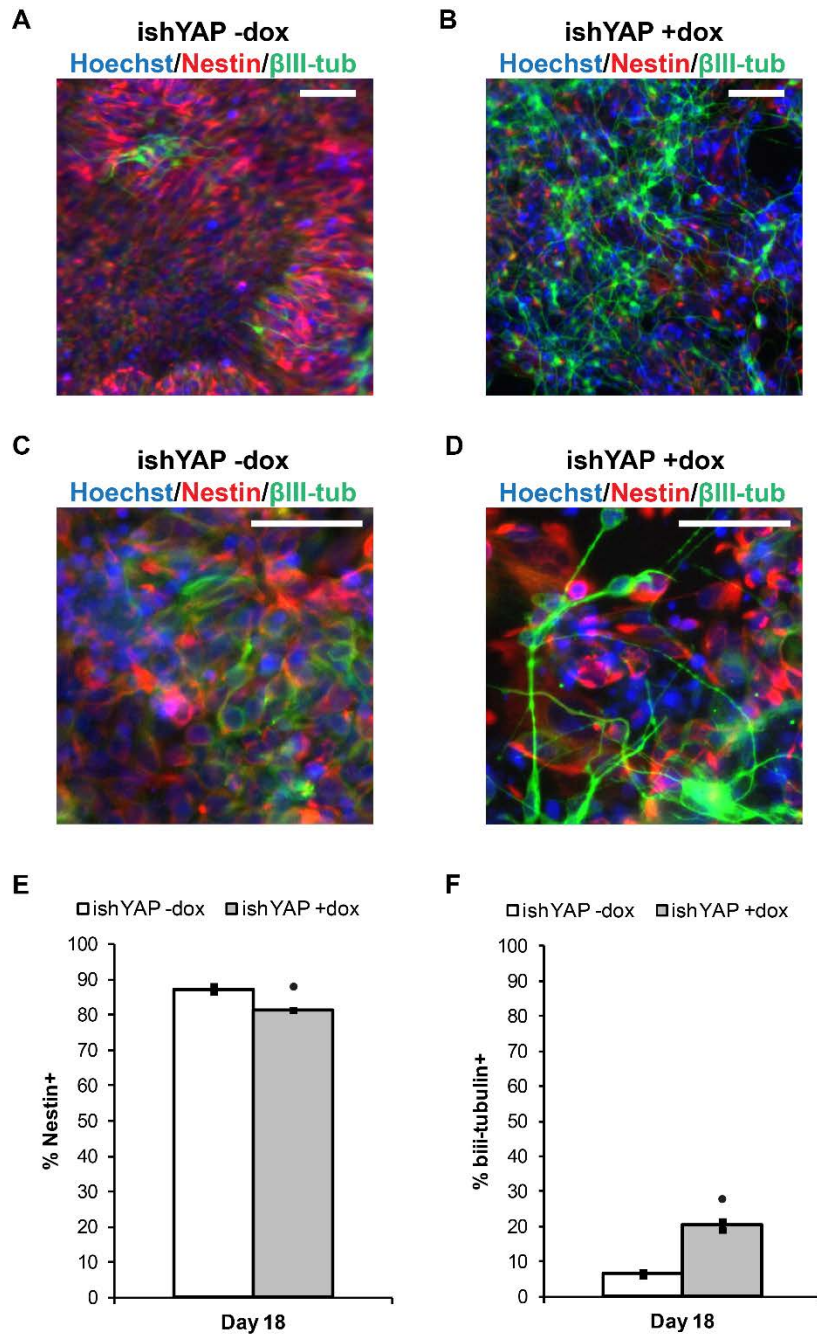

**Supplemental Figure 8.** YAP knockdown increased the conversion of hPSCs to neurons. H9 hESC ishYAP cells were plated on Matrigel at  $1.0 \times 10^5$  cell/cm<sup>2</sup> in E8 medium and neuroepithelial differentiation was initiated the next day by changing the medium to E6. Dox was added daily to fresh medium and compared to control cells with no dox added. (A - D) On Day 18, immunofluorescence was performed on (A, C) cells with no dox and (B, D) cells with dox added daily. Scale bars represent 50  $\mu$ m. (E, F) On Day 18, flow cytometry for percentage (E) Nestin positive cells and (F)  $\beta$ III-tubulin positive cells. Error bars represent standard deviation. (• indicates  $p < 0.05$  compared to no dox condition)



**Supplemental Table 1.** List of the antibodies and their dilutions utilized for immunofluorescence (IF), western blotting (WB) and flow cytometry (FC).

| Target         | Company                                        | Product # | Application               |
|----------------|------------------------------------------------|-----------|---------------------------|
| YAP            | Cell Signaling Technologies                    | 4912S     | 1:200 (IF)<br>1:1000 (WB) |
| phospho-YAP    | Cell Signaling Technologies                    | 4911S     | 1:200 (IF)<br>1:1000 (WB) |
| TAZ            | BD Pharmingen                                  | 560235    | 1:400 (IF)                |
| TAZ            | Cell Signaling Technologies                    | 2149S     | 1:1000 (WB)               |
| Histone H3     | Cell Signaling Technologies                    | 9715      | 1:1000 (WB)               |
| GAPDH          | Cell Signaling Technologies                    | 8884S     | 1:5000 (WB)               |
| $\beta$ -Actin | Cell Signaling Technologies                    | 5125S     | 1:5000 (WB)               |
| PAX6           | Developmental Studies<br>Hybridoma Bank (DSHB) |           | 1 $\mu$ g/mL (FC)         |
| Oct-3/4        | BD Pharmingen                                  | 560186    | 1:200 (FC)                |
| Nanog          | BD Pharmingen                                  | 560483    | 1:200 (FC)                |

**Supplemental Table 2.** List of the primer sequences, annealing temperatures ( $T_a$ ) and cycle numbers utilized for RT-PCR.

| Gene           | Primer Sequence |                           | $T_a$ (°C) | Cycles |
|----------------|-----------------|---------------------------|------------|--------|
| <i>TBP</i>     | fwd:            | CCCGAAACGCCGAATA          | 57         | 35     |
|                | rev:            | AATCAGTGCCGTGGTT          |            |        |
| <i>PCTK3</i>   | fwd:            | CCACAGCAACAGAAGGAATAG     | 57         | 35     |
|                | rev:            | AGAGCCCTGGGATGATAAG       |            |        |
| <i>SMARCA1</i> | fwd:            | GCAGTGGATGCCTACTTTAG      | 57         | 35     |
|                | rev:            | GAGGTTTCAGCTCCATCAATC     |            |        |
| <i>SCARA3</i>  | fwd:            | GGAGTGCTACGATGTCAAG       | 57         | 35     |
|                | rev:            | CAGGAAGGACGAGATGTTATC     |            |        |
| <i>RRM2</i>    | fwd:            | CAGAGTAGAGAACCCATTTGAC    | 57         | 35     |
|                | rev:            | TCACTCCCATCCTCTGATAC      |            |        |
| <i>RHOF</i>    | fwd:            | GCTGAAGATCGTGATC          | 57         | 35     |
|                | rev:            | CTTCTCGAACACCGAT          |            |        |
| <i>STXBP6</i>  | fwd:            | GTGCTGTCCTCACTTGTTCTAC    | 57         | 35     |
|                | rev:            | CTTTGTCCTCCTCTTGACTTGG    |            |        |
| <i>YAP1</i>    | fwd:            | GAACTCGGCTTCAGGTCCTC      | 57         | 35     |
|                | rev:            | GGGGTGGTGGCTGTTTCACT      |            |        |
| <i>TAZ</i>     | fwd:            | CCTGAAGTTGATGCGTTGGACC    | 57         | 35     |
|                | rev:            | TCCCCTCATTCTCTGCTTGGA     |            |        |
| <i>NANOG</i>   | fwd:            | CGAAGAATAGCAATGG          | 57         | 35     |
|                | rev:            | TTCCAAAGCAGCCTCC          |            |        |
| <i>SOX2</i>    | fwd:            | CAAGATGCACAACCTCG         | 57         | 35     |
|                | rev:            | GTTTCATGTGCGCGTAA         |            |        |
| <i>POU5F1</i>  | fwd:            | GAGAACAATGAGAACCTTCAGGAGA | 56         | 30     |
|                | rev:            | TTCTGGCGCCGGTTACAGAACCA   |            |        |

**Supplemental Table 3.** Taqman probe sets for qRT-PCR.

| <b>Antibody</b> | <b>Brand</b>      | <b>Assay ID</b> |
|-----------------|-------------------|-----------------|
| <i>ACTB</i>     | Life Technologies | Hs01060665_g1   |
| <i>YAP1</i>     | Life Technologies | Hs00902712_g1   |
